# Supplementary material for: A sarcopenia index based on serum creatinine and cystatin C cannot accurately detect either low muscle mass or sarcopenia in urban community-dwelling older people
Source: PubMed Central journal article supplement (PMC6070576; doi:10.1038/s41598-018-29808-6), 2018-08-01

## Title page

### Title:

A sarcopenia index based on serum creatinine and cystatin C cannot accurately detect either low muscle mass or sarcopenia in urban community-dwelling older people

### Authors:

Qian He, MSN<sup>1</sup>; Jiaojiao Jiang, MD<sup>2</sup>; Lingling Xie, MSN<sup>3</sup>; Luoying Zhang, MSN<sup>4</sup>;  
Ming Yang, MD<sup>3</sup>

### Running title

Sarcopenia index failed to detect sarcopenia

### Affiliations and addresses of all authors:

1. Outpatient Department, West China Hospital, Sichuan University, No. 37 Guoxue Lane, Chengdu, Sichuan, China.
2. The Center of Rehabilitation, West China Hospital, Sichuan University, No. 37 Guoxue Lane, Chengdu, Sichuan, China.
3. The Center of Gerontology and Geriatrics, West China Hospital, Sichuan University, No. 37 Guoxue Lane, Chengdu, Sichuan, China.
4. The Health Management Center, Shangjin Nanfu Hospital, No. 253 Shangjin

Street, Chengdu, Sichuan, China.

**Information of the corresponding author:**

Ming Yang, The Center of Gerontology and Geriatrics, West China Hospital,  
Sichuan University, No. 37 Guoxue Lane, Chengdu, China. Phone: +86 28 8542  
2326. Fax: +86 28 8542 2321. Email: [yangmier@gmail.com](mailto:yangmier@gmail.com)

Supplementary Figure 4. The ROC curves of the sarcopenia index for estimating sarcopenia against different “gold standards” in men: (A) EWGSOP criteria; (B) AWGS criteria; (C) IWGS criteria; and (D) FNIH criteria.

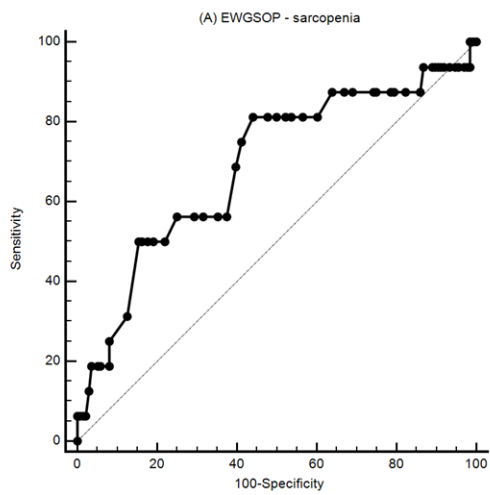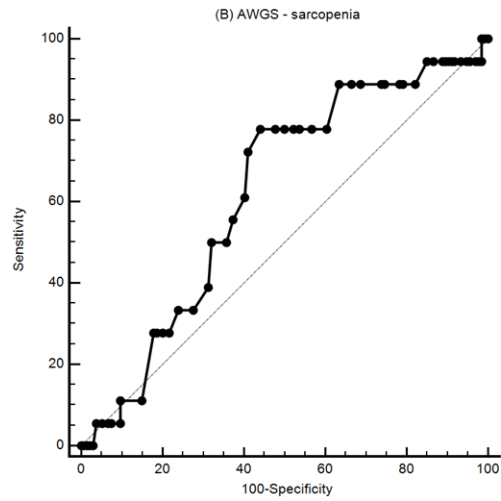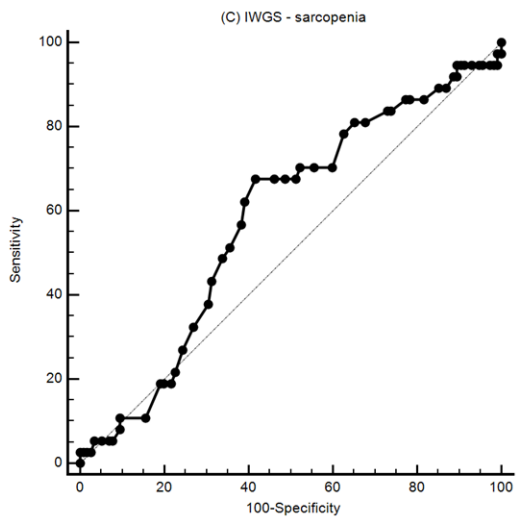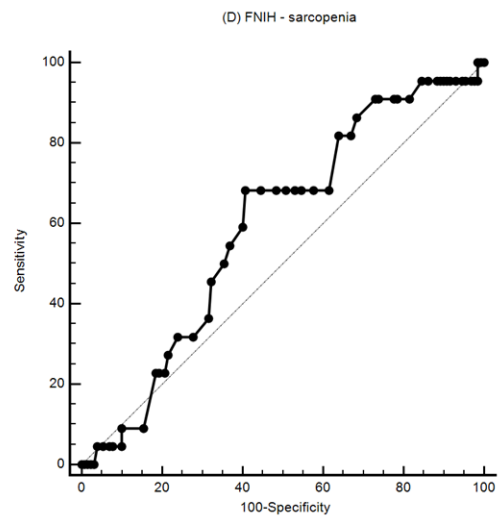

Supplement: 41598_2018_29808_MOESM4_ESM.pdf [file 41598_2018_29808_MOESM4_ESM.pdf]
